# Supplementary material for: Hierarchical porous ZnMnO3 yolk–shell microspheres with superior lithium storage properties enabled by a unique one-step conversion mechanism
Source: Royal Society of Chemistry journal article supplement (doi:10.1039/c8ra05871g), 2018-01-01
Supplement: c8ra05871g1.pdf [file c8ra05871g1.pdf]

## Supplementary Information

### **Hierarchical Porous ZnMnO<sub>3</sub> Yolk-Shell Microspheres with Superior Lithium Storage Properties Enabled by Unique One-Step Conversion Mechanism**

Xiaoru Su<sup>a</sup>, Jian Huang<sup>a</sup>, Bangyuan Yan<sup>a</sup>, Zhouping Hong<sup>a</sup>, Siyuan Li<sup>b</sup>, Baocheng Pang<sup>a</sup>, Yulin Luo<sup>a</sup>, Li Feng<sup>a</sup>, Mingjiong Zhou<sup>a,\*</sup>, Yongyao Xia<sup>c</sup>

*<sup>a</sup>School of Materials Science and Chemical Engineering, Ningbo University, Ningbo, Zhejiang, 315211, P.R. China*

*<sup>b</sup>State Key Laboratory of Chemical Engineering, Institute of Pharmaceutical Engineering, College of Chemical and Biological Engineering, Zhejiang University, Hangzhou, Zhejiang, 310027, P.R. China*

*<sup>c</sup>Department of Chemistry, Fudan University, Shanghai, 200433, P.R. China*

Corresponding author:

E-mail address: zhoumingjiong@nbu.edu.cn (M. Zhou)

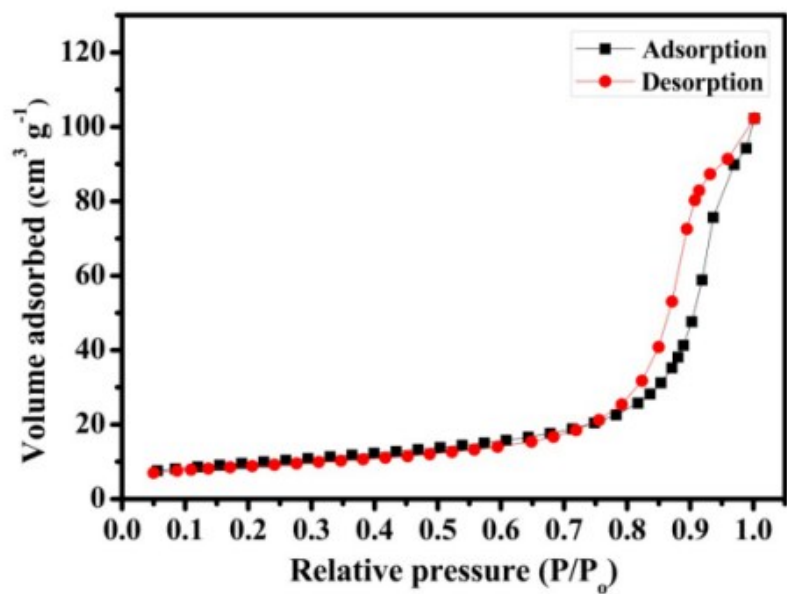

**Fig. S1** The N<sub>2</sub> adsorption-desorption isotherms of ZnMnO<sub>3</sub> core-shell microspheres.

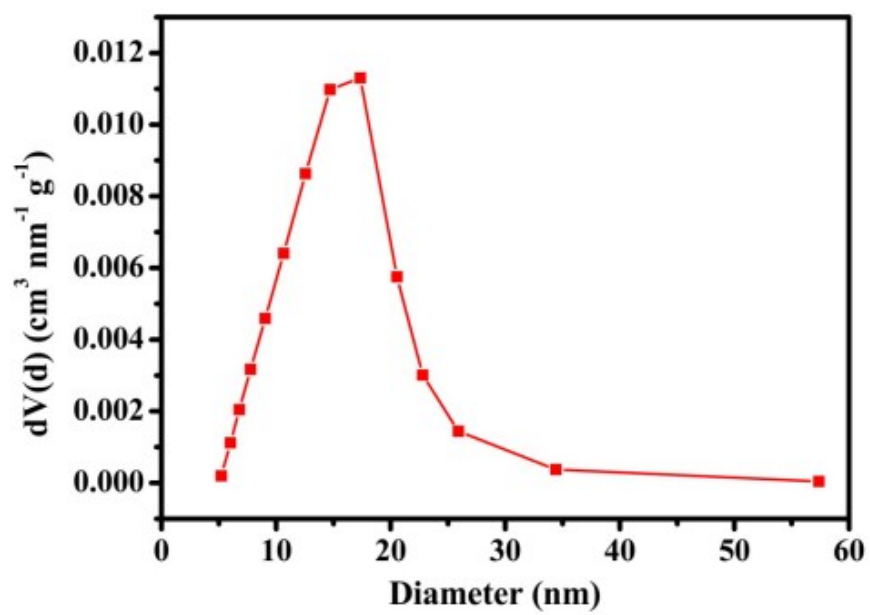

**Fig. S2** Pore size distribution based on DFT method of ZnMnO<sub>3</sub> core-shell microspheres.

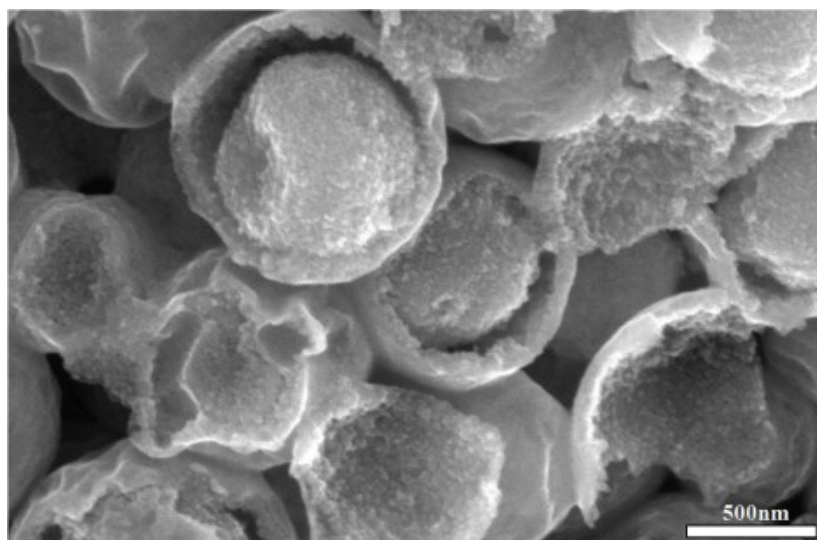

**Fig. S3** SEM image of ZnMnO<sub>3</sub> core-shell microspheres obtained by the vigorous ultrasound.

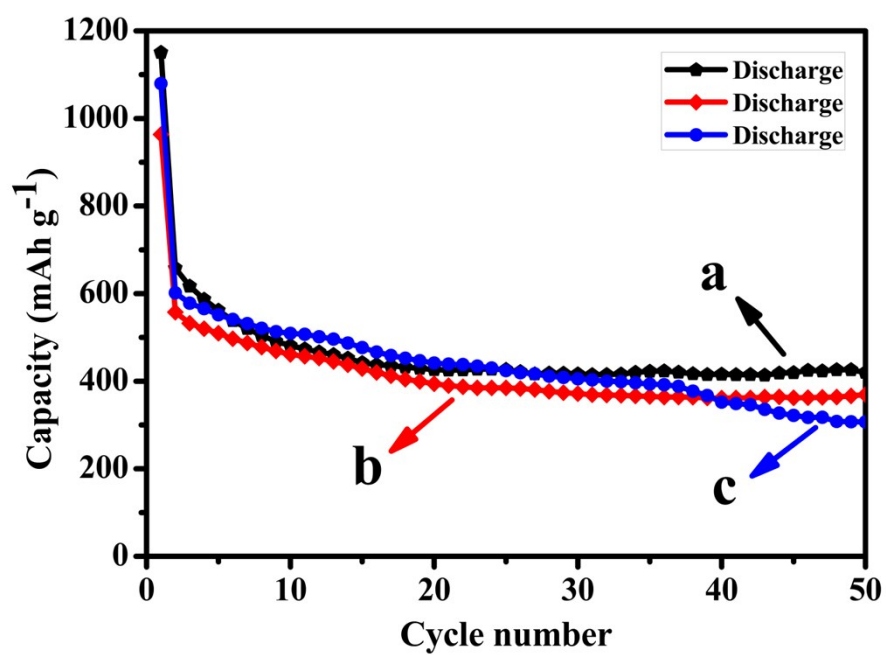

**Fig. S4** Cycling life at the same current density of  $400 \text{ mA g}^{-1}$ : (a) the data as shown in Fig. 4; (b) the active material loading is  $2.3 \text{ mg cm}^{-2}$ ; (c) the mass ratio of conductive carbon decreases by 10 wt%.

| Sample             | Morphology             | First charge capacity<br>(mAh g <sup>-1</sup> ) | Cycles | Capacity retention<br>(%) | References |
|--------------------|------------------------|-------------------------------------------------|--------|---------------------------|------------|
| ZnMnO <sub>3</sub> | Nanorod                | ~600                                            | 300    | 63                        | [5]        |
| ZnMnO <sub>3</sub> | Porous spherulite      | ~890                                            | 50     | 89                        | [10]       |
| ZnMnO <sub>3</sub> | Yolk-shell microsphere | ~600                                            | 300    | 90                        |            |

**Table 1** Comparison of electrochemical properties of ZnMnO<sub>3</sub> with different morphology.
